# Supplementary material for: Many Cooks in the Kitchen: Iterating a Qualitative Analysis Process Across Multiple Countries, Sites, and Teams
Source: PubMed Central journal article supplement (PMC10749643; doi:10.9745/ghsp-d-23-00143), 2023-12-22
Supplement: GHSP-D-23-00143_supplements_1-2.pdf [file GHSP-D-23-00143_supplements_1-2.pdf]

## SUPPLEMENT 1. ICAN Study Post-interview Report Form

| Interview information |  |
|-----------------------|--|
| Interview date & time |  |
| Location              |  |
| Participant ID #      |  |
| Interviewer           |  |

| Interview guide                                                                                                                                                                                                                       |  |
|---------------------------------------------------------------------------------------------------------------------------------------------------------------------------------------------------------------------------------------|--|
| 1. How did the interviewee describe their contraceptive decisions?<br>(Consider when the interviewee started using contraception, how they decided to use contraception, and how they settled on their current contraceptive method.) |  |
| 2. How did the interviewee describe the process of procuring contraception?<br>(Consider where the interviewee currently accesses their contraception and if they are satisfied with their current way of accessing contraception.)   |  |
| 3. What things did the interviewee mention that made it <u>easier</u> to achieve their contraceptive preferences/choices?                                                                                                             |  |
| 4. What things did the interviewee mention that made it <u>harder</u> to achieve their contraceptive preferences/choices?                                                                                                             |  |
| 5. What did the interviewee think about self-injection?                                                                                                                                                                               |  |
| 6. Was there anything surprising about the interview?                                                                                                                                                                                 |  |
| 7. Did you face any problems or challenges in the interview?                                                                                                                                                                          |  |
| 8. Are there any changes we should consider making to the interview guide? (examples: changing the wording of questions, adding NEW questions or follow-up questions, changing the order of questions)                                |  |

**Supplement to:** Suchman L, Gitome S, Nyando M, et al. Many cooks in the kitchen: iterating a qualitative analysis process across multiple countries, sites, and teams. *Glob Health Sci Pract.* 2023;11(6):e2300143. <https://doi.org/10.9745/GHSP-D-23-00143>

## **SUPPLEMENT 2. ICAN Analysis Meeting Notes – [DATE]**

| <b>Research question</b>                                                               | <b>[RESEARCHER 1]</b> | <b>[RESEARCHER 2]</b> | <b>[RESEARCHER 3]</b> |
|----------------------------------------------------------------------------------------|-----------------------|-----------------------|-----------------------|
| How do women form consciousness about contraceptive rights?                            |                       |                       |                       |
| How do women form contraceptive preferences?                                           |                       |                       |                       |
| What influences whether and how women can act on contraceptive rights and preferences? |                       |                       |                       |

Suggested codes:

Suggested changes to the guide:

Advice for interviewers:

Notes for transcribers:

Next steps:
